# Supplementary material for: Luminescent and paramagnetic properties of nanoparticles shed light on their interactions with proteins
Source: PubMed Central journal article supplement (PMC5821874; doi:10.1038/s41598-018-21571-y), 2018-02-21
Supplement: 41598_2018_21571_MOESM1_ESM.pdf [file 41598_2018_21571_MOESM1_ESM.pdf]

## Supplementary information

### **Luminescent and paramagnetic properties of nanoparticles shed light on their interactions with proteins**

by Giuditta Dal Cortivo, Gabriel E. Wagner, Paolo Cortelletti, Krishna Mohan Padmanabha Das, Klaus Zangger, Adolfo Speghini, and Daniele Dell'Orco, N. Helge Meyer

#### **Supplementary Figure S1**

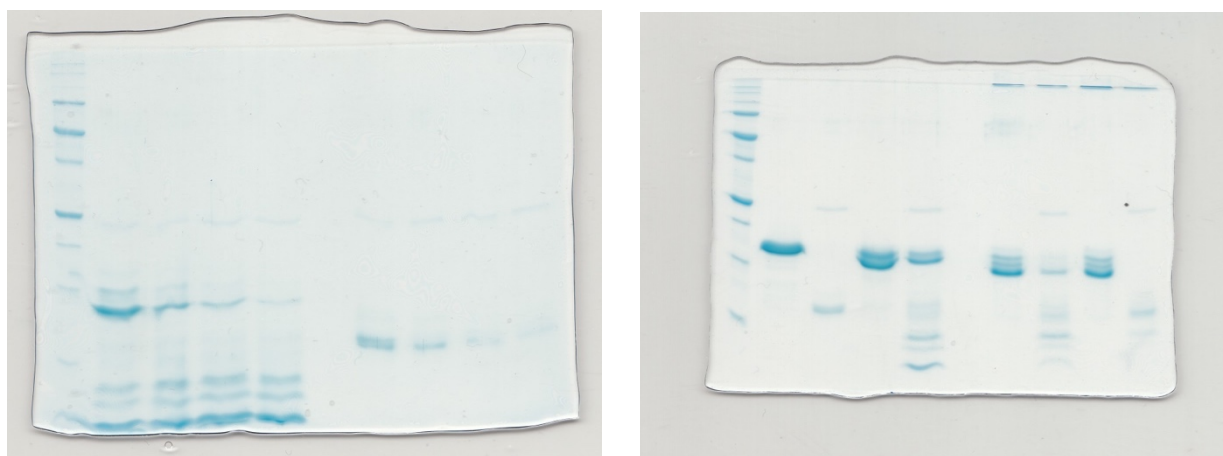

Full-length gels (uncropped) used to prepare panels **a** (left) and **b** (right) in Figure 2, respectively.
